# Supplementary material
Source: Elsevier journal article supplement (https://www.sciencedirect.com/science/article/pii/S1885585716000736)
Supplement: mmc1 [file S1885585716000736:mmc1.pdf]

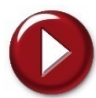

## Supplementary material

---

### **Prevalence and Prognosis of High-risk Myocardial Infarction Patient Candidates to Extended Antiplatelet Therapy**

Jaume Marrugat, Roberto Elosua, María Grau, Sergi Sayols Baixeras  
and Irene R. Dégano

*Grupo de Investigación en Epidemiología y Genética Cardiovascular, Programa  
de Epidemiología y Salud Pública, IMIM (Institut Hospital del Mar d'Investigacions Mèdiques),  
Barcelona, España*

---

**Table 1 of the supplementary material.**

Acute Myocardial Infarction Annual Incidence (x 100 000) and Mortality Rates (x 100) by Sex and Age Group in Spain

|                                              | 45-54 y  | 55-64 y | 65-74 y | 75-84 y | > 84 y  |
|----------------------------------------------|----------|---------|---------|---------|---------|
| <b>Men</b>                                   |          |         |         |         |         |
| Incidence                                    | 0.00190  | 0.00325 | 0.00548 | 0.01723 | 0.01723 |
| Mortality 1 <sup>st</sup> y                  | 0.04670  | 0.08115 | 0.13968 | 0.20222 | 0.26136 |
| Mortality 2 <sup>nd</sup> -4 <sup>th</sup> y | 0.01072  | 0.02711 | 0.04732 | 0.05693 | 0.06944 |
| <b>Women</b>                                 |          |         |         |         |         |
| Incidence                                    | 0.00023  | 0.00082 | 0.00237 | 0.01238 | 0.01238 |
| Mortality 1 <sup>st</sup> y                  | 0.04762  | 0.09756 | 0.16851 | 0.21413 | 0.40503 |
| Mortality 2 <sup>nd</sup> -4 <sup>th</sup> y | 0.02749* | 0.02749 | 0.04212 | 0.01818 | 0.06250 |

AMI, acute myocardial infarction.

Data obtained from the IBERICA and REGICOR population AMI Registries. IBERICA: incidence rates for the population aged 45-74 years. Rates were adjusted for clustering and AMI definition change.

REGICOR: incidence rates in population > 74 years and mortality rates. Incident rates in the population > 74 years were weighted for the observed differences in incidence rates between Girona and Spain in the 65-74 years age group in the IBERICA Study (1126 in men and 1263 in women). Due to the similarity of the population > 75 years and to the low sample size, the incidence was combined for age groups 75-84 years and > 84 years. \* There were no patients in this group, so the incidence of the following age group was assumed.

**Table 2 of the supplementary material.**

Bleeding Risk in Acute Myocardial Infarction Patients During Hospital Admission and During the First Year After The Event in Patients From the REGICOR Registry From 2003-2009.

|         | In-hospital risk of bleeding (CRUSADE scale) |        | Risk of bleeding during the 1 <sup>st</sup> year post AMI (CARDIOCHUS scale) |        |
|---------|----------------------------------------------|--------|------------------------------------------------------------------------------|--------|
|         | Men                                          | Women  | Men                                                                          | Women  |
| 45-54 y | 4.00%                                        | 6.30%  | 1.54%                                                                        | 5.05%  |
| 55-64 y | 5.20%                                        | 7.39%  | 3.24%                                                                        | 6.89%  |
| 65-74 y | 7.52%                                        | 10.93% | 7.25%                                                                        | 12.82% |

First, the number of patients in each scale category was calculated and then this number was combined with the described risk for each category<sup>1,2</sup> to obtain the expected risk in each group.

AMI, acute myocardial infarction.

### Table 3 of the supplementary material

Prevalence of PEGASUS Main Characteristics in Stable Acute Myocardial Infarction Patients Aged > 49 Years in the 2003-2009 REGICOR Registry, When no Age Limit Was Established in the Recruitment

|         | Men (n = 1378) |              |       | Women (n = 439) |              |       |
|---------|----------------|--------------|-------|-----------------|--------------|-------|
|         | Diabetes       | Previous AMI | CKD   | Diabetes        | Previous AMI | CKD   |
| 50-64 y | 27.8%          | 9.2%         | 9.2%  | 33.1%           | 7.7%         | 14.6% |
| 65-74 y | 35.5%          | 17.4%        | 23.1% | 35.7%           | 9.5%         | 30.3% |
| 75-84 y | 25.4%          | 19.0%        | 28.7% | 40.6%           | 13.4%        | 38.6% |
| ≥ 85 y  | 40.0%          | 26.3%        | 30.0% | 45.0%           | 42.1%        | 75.0% |
| ≥ 50 y  | 28.9%          | 14.5%        | 14.6% | 40.4%           | 13.3%        | 33.5% |

AMI, acute myocardial infarction; CKD, chronic kidney disease.

**Table 4 of the supplementary material**

Prevalence of > 0, > 1 and > 2 PEGASUS Characteristics in Stable Acute Myocardial Infarction Patients in the REGICOR Registry, 2007-2008, by Age Group

|       | 55-64 y | 65-74 y | 75-84 y | >84 y |
|-------|---------|---------|---------|-------|
| <hr/> |         |         |         |       |
| Men   |         |         |         |       |
| >0    | 37.3%   | 47.1%   | 56.1%   | 72.7% |
| >1    | 5.3%    | 15.2%   | 18.4%   | 27.3% |
| >2    | 1.0%    | 2.9%    | 3.5%    | 3.5%* |
| Women |         |         |         |       |
| >0    | 38.1%   | 66.7%   | 60.3%   | 85.7% |
| >1    | 11.9%   | 11.8%   | 26.0%   | 57.1% |
| >2    | 4.8%    | 4.8%*   | 6.8%    | 19.0% |
| <hr/> |         |         |         |       |

AMI, acute myocardial infarction.

\* There were no patients in these groups so the prevalence of the previous age group was assumed.

**Table 5 of the supplementary material**

Incidence (x 100) of Events in Stable Acute Myocardial Infarction Patients With and Without PEGASUS  
Criteria Obtained by Competing Risk Adjusted Survival Analysis

|                                                                                 | Non-PEGASUS |              | PEGASUS  |                |
|---------------------------------------------------------------------------------|-------------|--------------|----------|----------------|
|                                                                                 | Estimate    | 95%CI        | Estimate | 95%CI          |
| Annual incidence during the second year after the index AMI                     |             |              |          |                |
| AMI                                                                             | 1.52        | (0.68, 2.98) | 2.62     | (1.72, 3.81)   |
| CV death                                                                        | 0.22        | (0.02, 1.16) | 0.76     | (0.34, 1.52)   |
| Non-CV death                                                                    | 0.43        | (0.09, 1.47) | 1.31     | (0.72, 2.22)   |
| All-cause death                                                                 | 0.64        | (0.18, 1.77) | 2.05     | (1.28, 3.12)   |
| Incidence during a median follow-up of 4.7 years after 1 year of stable disease |             |              |          |                |
| AMI                                                                             | 6.38        | (3.83, 9.79) | 7.68     | (5.88, 9.77)   |
| CV death                                                                        | 0.96        | (0.32, 2.33) | 13.39    | (6.96, 21.94)  |
| Non-CV death                                                                    | 2.95        | (1.25, 5.86) | 9.67     | (6.45, 13.65)  |
| All-cause death                                                                 | 3.86        | (1.94, 6.82) | 22.95    | (15.28, 31.57) |

AMI, acute myocardial infarction; CI, confidence interval; CV, cardiovascular

**Table 6 of the supplementary material**

Harrell's C for the Cox Proportional Hazards Regression Models at 4.7 Years of Median Follow-up

| Outcome at 4.7<br>years of median<br>follow-up↓ | Harrell's C Model1<br>(SE) | Harrell's C<br>Model2<br>(SE) | Harrell's C<br>Model3<br>(SE) | Harrell's C<br>Model4<br>(SE) |
|-------------------------------------------------|----------------------------|-------------------------------|-------------------------------|-------------------------------|
| AMI                                             | 0.529 (0.027)              | 0.629 (0.035)                 | 0.646 (0.037)                 | 0.654 (0.037)                 |
| CV death                                        | 0.637 (0.028)              | 0.732 (0.037)                 | 0.746 (0.039)                 | 0.759 (0.040)                 |
| Non-CV death                                    | 0.604 (0.03)               | 0.700 (0.041)                 | 0.729 (0.042)                 | 0.734 (0.043)                 |
| All-cause death                                 | 0.622 (0.021)              | 0.712 (0.028)                 | 0.717 (0.029)                 | 0.727 (0.029)                 |
| AMI/All-cause death                             | 0.579 (0.017)              | 0.644 (0.023)                 | 0.645 (0.024)                 | 0.655 (0.024)                 |

Model 1: outcome~PEGASUS; Model 2: outcome~PEGASUS + age + hypertension + smoking + heart failure

Model 3: as model 2 plus ST elevation + reperfusion + arrhythmia + maximum Killip class

Model 4: as model 3 plus beta-blockers and lipid-lowering drugs at discharge

SE, standard error.

**Table 7 of the supplementary material**

Hazard Ratio of Outcomes During a 4.7 Years of Median Follow-up of Stable PEGASUS Acute Myocardial Infarction Patients Including Multivessel Coronary Heart Disease in the PEGASUS Definition

|                     | Model 1             | Model 2             | Model 3            | Model 4            |
|---------------------|---------------------|---------------------|--------------------|--------------------|
|                     | HR (95% CI)         | HR (95% CI)         | HR (95% CI)        | HR (95% CI)        |
| AMI                 | 1.16 (0.69, 1.94)   | 1.22 (0.63, 2.36)   | 1.11 (0.49, 2.56)  | 1.12 (0.49, 2.56)  |
| CV death            | 8.92 (2.81, 28.32)* | 4.29 (1.22, 15.07)* | 2.73 (0.71, 10.42) | 2.81 (0.73, 10.74) |
| Non-CV death        | 3.69 (1.59, 8.54)*  | 1.72 (0.63, 4.73)   | 1.32 (0.37, 4.76)  | 1.19 (0.33, 4.33)  |
| All-cause death     | 5.43 (2.76, 10.67)* | 2.58 (1.19, 5.58)*  | 1.91 (0.76, 4.79)  | 1.83 (0.73, 4.60)  |
| AMI/All-cause death | 2.22 (1.49, 3.32)*  | 1.41 (0.85, 2.34)   | 1.29 (0.70, 2.39)  | 1.26 (0.68, 2.34)  |

AMI, acute myocardial infarction; CHD, coronary heart disease; CI, confidence interval; CV, cardiovascular; HR, hazard ratio.

Models: 1=Crude HR; 2=Adjusted for age, hypertension, smoking, heart failure; 3 = As model 2 plus ST elevation, reperfusion, arrhythmia, maximum Killip class; 4=As model 3 plus beta-blockers and lipid-lowering drugs at discharge. \* $P < .05$



# Table 8 of the supplementary material

Estimated Annual Number of Acute Myocardial Infarction Patients  $\geq 50$  Years, Stable and Without Bleeding Events at 1-year Follow-up, in Spain in 2014.

|             | Hospitalized AMI patients<br>n (95%CI) | Stable AMI patients at<br>1 year<br>n (95%CI) | Stable AMI patients<br>without severe bleeding<br>n (95%CI) |
|-------------|----------------------------------------|-----------------------------------------------|-------------------------------------------------------------|
| 50-64 y     | 11831 (11620; 12046)                   | 11021 (10017; 11229)                          | 10077 (9882; 10276)                                         |
| 65-74 y     | 13157 (12934; 13384)                   | 11192 (10987; 11401)                          | 9301 (9114; 9492)                                           |
| 75-84 y     | 25544 (25233; 25859)                   | 20234 (19957; 20515)                          | 16583 (16332; 16837)                                        |
| > 84 y      | 9996 (9802; 10194)                     | 6560 (6403; 6721)                             | 5350 (5209; 5495)                                           |
| $\geq 50$ y | 60528 (60047; 61012)                   | 49007 (48575; 49442)                          | 41311 (40914; 41711)                                        |

AMI, acute myocardial infarction; CI, confidence interval.

**Table 9 of the supplementary material**

Estimated Annual Number of Acute Myocardial Infarction Patients  $\geq 50$  Years, by Number of PEGASUS Criteria, in Spain in 2014

|             | $\geq 1$ PEGASUS<br>characteristic<br>n (95%CI) | $\geq 2$ PEGASUS<br>characteristics<br>n (95%CI) | 3 PEGASUS<br>characteristics<br>n (95%CI) |
|-------------|-------------------------------------------------|--------------------------------------------------|-------------------------------------------|
| 50-64 y     | 3746 (3628; 3868)                               | 627 (580; 678)                                   | 171 (147; 199)                            |
| 65-74 y     | 4943 (4807; 5083)                               | 1310 (1241; 1383)                                | 336 (302; 374)                            |
| 75-84 y     | 9582 (9392; 9776)                               | 3576 (3461; 3695)                                | 793 (740; 850)                            |
| > 84 y      | 4223 (4098; 4352)                               | 2239 (2148; 2334)                                | 584 (538; 633)                            |
| $\geq 50$ y | 22493 (22200; 22788)                            | 7752 (7581; 7926)                                | 1885 (1802; 1972)                         |

AMI, acute myocardial infarction; CI, confidence interval.

\*PEGASUS criteria: diabetes, previous AMI and chronic disease.

**Table 10 of the supplementary material**

Estimated Number of Patients Older Than 50 Years With Stable Coronary Artery Disease After Previous (1-3 Years) Acute Myocardial Infarction, in Spain in 2014.

|         | <b>Men</b> |                    | <b>Women</b> |                  |
|---------|------------|--------------------|--------------|------------------|
|         | n          | 95%CI              | n            | 95%CI            |
| 50-64 y | 29 518     | (29 183; 29 856)   | 6 457        | (6 301; 6 616)   |
| 65-74 y | 24 171     | (23 868; 24 477)   | 11 655       | (11 445; 11 868) |
| 75-84 y | 45 370     | (44 954; 45 789)   | 48 863       | (48 431; 49 298) |
| > 84 y  | 11 528     | (11 319; 11740)    | 13 927       | (13 697; 14 160) |
| ≥ 50 y  | 110 589    | (109 939; 111 242) | 80 902       | (80 346; 81 461) |

CI, confidence interval

**Table 11 of the supplementary material**

Crude Incidence (x 100) of Events in Stable Acute Myocardial Infarction Patients With and Without PEGASUS Criteria, at 3 Years After the Index Acute Myocardial Infarction

|                     | Non-PEGASUS (n = 470) | PEGASUS (n = 936) |
|---------------------|-----------------------|-------------------|
| AMI                 | 3.1                   | 4.4               |
| CV death            | 0.4*                  | 3.2               |
| Non-CV death        | 0.6*                  | 3.1               |
| All-cause death     | 1.1*                  | 6.4               |
| AMI/All-cause death | 4.4*                  | 10.5              |

AMI, acute myocardial infarction; CV, cardiovascular. \* $P < .05$

**Table 12 of the supplementary material**

Hazard Ratio of Outcomes at 2 Years In PEGASUS vs non-PEGASUS Patients.

|                     | Model 1                         | Model 2                        | Model 3                        | Model 4            |
|---------------------|---------------------------------|--------------------------------|--------------------------------|--------------------|
|                     | HR (95%CI)                      | HR (95%CI)                     | HR (95%CI)                     | HR (95%CI)         |
| AMI                 | 1.80 (0.78, 4.17)               | 2.48 (0.89, 6.94) <sup>†</sup> | 2.52 (0.90, 7.05) <sup>†</sup> | 2.37 (0.83, 6.76)  |
| CV death            | 6.10 (0.79, 46.89) <sup>†</sup> | 4.61 (0.50, 42.66)             | 4.45 (0.48, 41.44)             | 4.36 (0.47, 40.39) |
| Non-CV death        | 3.56 (0.81, 15.67) <sup>†</sup> | 2.25 (0.38, 13.19)             | 1.82 (0.30, 10.81)             | 1.73 (0.29, 10.35) |
| All-cause death     | 4.41 (1.33, 14.56) <sup>*</sup> | 3.07 (0.78, 11.99)             | 2.70 (0.68, 10.62)             | 2.63 (0.67, 10.35) |
| AMI/All-cause death | 2.34 (1.18, 4.64) <sup>*</sup>  | 2.26 (0.97, 5.23) <sup>†</sup> | 2.15 (0.92, 5.00) <sup>†</sup> | 2.03 (0.86, 4.76)  |

AMI, acute myocardial infarction; CI, confidence interval; CV, cardiovascular; HR, hazard ratio.

Models: 1 = crude HR, 2 = adjusted for age, hypertension, heart failure, 3= as model 2 plus reperfusion and beta-blocker therapy during hospitalization, 4 = as model 3 plus antiplatelet therapy at discharge.

<sup>\*</sup> $P < .05$ ; <sup>†</sup> $P < .1$

**Table 13 of the supplementary material**

Analysis of Outcome Predictors in the Follow-up of PEGASUS Patients

|                            | AMI                | CV death           | Non-CV death       | All-cause death    | AMI/All-cause death |
|----------------------------|--------------------|--------------------|--------------------|--------------------|---------------------|
|                            | HR (95%CI)          |
| Age                        |                    | 1.05 (1.00, 1.10)  | 1.05 (0.99, 1.12)  | 1.06 (1.02, 1.10)* | 1.04 (1.01, 1.07)*  |
| Diabetes                   |                    | 1.73 (0.98, 3.05)  |                    |                    | 1.43 (0.99, 2.05)†  |
| Previous AMI               | 2.17 (1.18, 4.00)* | 1.76 (0.94, 3.29)  |                    | 1.61 (0.99, 2.61)* | 2.05 (1.39, 3.03)*  |
| eGFR                       |                    | 0.98 (0.97, 0.99)* |                    | 0.99 (0.98, 0.99)* | 0.99 (0.98, 0.99)*  |
| Hypertension               | 2.77 (1.24, 6.19)* |                    |                    |                    |                     |
| Smoking                    |                    |                    |                    | 1.39 (0.84, 2.27)  |                     |
| Heart failure              |                    | 2.82 (1.52, 4.60)* | 2.30 (1.15, 4.60)* | 2.11 (1.39, 3.21)* | 1.59 (1.10, 2.30)*  |
| Arrhythmia                 | 0.52 (0.22, 1.23)  |                    |                    |                    |                     |
| Beta-blockers at discharge |                    |                    | 0.40 (0.20, 0.81)* | 0.53 (0.35, 0.81)* | 0.60 (0.42, 0.87)*  |

AMI, acute myocardial infarction; ; eGFR, estimated glomerular filtration rate; HR, hazard ratio; LVEF, left ventricular ejection fraction.

Model building strategy:

- 1) Inclusion of all variables that showed an association with the outcome on bivariate analysis ( $P < .25$ )
- 2) Exclusion of the variables (one-by-one) that reduced the likelihood ( $P > 0.1$ ) until further reduction was not possible ( $P < .1$ )
- 3) Reconsideration of all excluded variables (one-by-one) ( $P < .1$ )

\* $P < .05$

## REFERENCES

1. Subherwal S, Bach RG, Chen AY, Gage BF, Rao SV, Newby LK, et al. Baseline risk of major bleeding in non-ST-segment elevation myocardial infarction: the CRUSADE bleeding score. *Circulation*. 2009;119:1873–82.
2. Raposeiras S, Abu-Assi E, Alvarez B, Gonzalez MC, Mazon-Ramos P, Virgós A, et al. Prediction of bleeding admission in the first year after acute coronary syndrome and prognostic impact: the cardiochus bleeding risk score [abstract]. *J Am Coll Cardiol*. 2014;63(Suppl12):A32.
